# Supplementary material for: Microbial Community Analysis of Anaerobic Reactors Treating Soft Drink Wastewater
Source: PubMed Central journal article supplement (PMC4352018; doi:10.1371/journal.pone.0119131), 2015-03-06
Supplement: pone.0119131.s006.pdf [file pone.0119131.s006.pdf]

Table S1. Pyrosequencing results of 16S rRNA genes amplicon reads from anaerobic packed-bed (AP) and hybrid packed-bed (HP) reactors.

|                                  | seed   | Operation days at sampling on AP reactor |       |       |       |       |       |       |       |       |       |       |       | Operation days at sampling on HP reactor |       |       |       |       |       |       |       |       |       |       |       |
|----------------------------------|--------|------------------------------------------|-------|-------|-------|-------|-------|-------|-------|-------|-------|-------|-------|------------------------------------------|-------|-------|-------|-------|-------|-------|-------|-------|-------|-------|-------|
|                                  |        | 64                                       | 121   | 181   | 251   | 321   | 435   | 462   | 530   | 600   | 664   | 722   | 772   | 64                                       | 121   | 181   | 251   | 321   | 435   | 462   | 530   | 600   | 664   | 722   | 772   |
| Total 16S pyrotag reads          | 14,090 | 4,622                                    | 4,717 | 4,363 | 2,035 | 2,823 | 1,031 | 2,213 | 6,215 | 5,510 | 5,881 | 4,229 | 4,262 | 1,955                                    | 3,737 | 7,336 | 3,478 | 2,637 | 1,105 | 2,045 | 3,458 | 3,415 | 3,069 | 2,147 | 1,684 |
| Total OTU number (>97% identity) | 1,008  | 274                                      | 304   | 318   | 153   | 184   | 133   | 198   | 432   | 395   | 317   | 361   | 307   | 235                                      | 318   | 232   | 189   | 182   | 135   | 189   | 311   | 292   | 249   | 209   | 196   |
| Good's coverage                  | 96.8   | 96.8                                     | 97.4  | 96.7  | 96.2  | 96.8  | 93.8  | 96.3  | 96.8  | 96.7  | 97.6  | 95.8  | 96.8  | 93.3                                     | 96.4  | 99.9  | 97.2  | 96.7  | 93.9  | 95.3  | 95.8  | 96.3  | 96.0  | 95.0  | 93.7  |
| Chao1                            | 1,680  | 552                                      | 525   | 612   | 341   | 338   | 259   | 302   | 716   | 688   | 533   | 682   | 522   | 485                                      | 506   | 232   | 401   | 332   | 220   | 355   | 622   | 487   | 429   | 392   | 505   |

AP, anaerobic packed-bed reactor; HP, hybrid packed-bed reactor; OTU, operational taxonomic unit.
