# Supplementary material for: Microbial Community Analysis of Anaerobic Reactors Treating Soft Drink Wastewater
Source: PubMed Central journal article supplement (PMC4352018; doi:10.1371/journal.pone.0119131), 2015-03-06
Supplement: pone.0119131.s007.pdf [file pone.0119131.s007.pdf]

Table S2. Microbial community composition of anaerobic packed-bed (AP) and hybrid packed-bed (HP) reactors.

| Group                        | Seed  | Sampling date on AP reactor (population %) |       |       |       |       |       |       |       |       |       |         |       | Sampling date on HP reactor (population %) |       |       |       |       |       |       |       |       |       |       |       |
|------------------------------|-------|--------------------------------------------|-------|-------|-------|-------|-------|-------|-------|-------|-------|---------|-------|--------------------------------------------|-------|-------|-------|-------|-------|-------|-------|-------|-------|-------|-------|
|                              |       | 64                                         | 121   | 181   | 251   | 321   | 435   | 462   | 530   | 600   | 664   | 722     | 772   | 64                                         | 121   | 181   | 251   | 321   | 435   | 462   | 530   | 600   | 664   | 722   | 772   |
| <i>Bacteria</i>              |       |                                            |       |       |       |       |       |       |       |       |       |         |       |                                            |       |       |       |       |       |       |       |       |       |       |       |
| <i>Deltaproteobacteria</i>   | 4.414 | 6.859                                      | 24.02 | 22.92 | 43.69 | 35.85 | 18.33 | 41.35 | 33.56 | 28.62 | 16.44 | 23.81   | 13.33 | 8.747                                      | 15.36 | 43.62 | 44.74 | 42.97 | 24.52 | 24.79 | 24.41 | 23.69 | 28.67 | 14.53 | 22.21 |
| <i>Bacteroidetes</i>         | 18.23 | 43.05                                      | 20.9  | 14.6  | 10.61 | 8.466 | 22.41 | 8.224 | 6.404 | 5.118 | 2.925 | 11.94   | 13.75 | 40.77                                      | 20.93 | 13.94 | 8.309 | 7.167 | 7.783 | 4.352 | 8.473 | 6.442 | 8.048 | 12.95 | 11.4  |
| <i>Chloroflexi</i>           | 8.559 | 4.998                                      | 10.73 | 11.96 | 10.66 | 19.45 | 9.602 | 10.8  | 9.22  | 7.042 | 3.877 | 6.172   | 13.42 | 3.734                                      | 10.2  | 7.266 | 11.53 | 12.51 | 18.46 | 11.2  | 10.29 | 12.39 | 12.41 | 12.76 | 10.93 |
| <i>Firmicutes</i>            | 35.64 | 9.022                                      | 12.51 | 15.4  | 9.73  | 11.19 | 9.214 | 5.92  | 4.94  | 3.466 | 2.398 | 3.452   | 12.79 | 16.57                                      | 12.95 | 8.451 | 6.613 | 7.395 | 3.891 | 4.597 | 5.09  | 3.572 | 5.213 | 3.866 | 8.67  |
| <i>Spirochaetes</i>          | 5.813 | 0.563                                      | 2.777 | 7.128 | 7.371 | 13.57 | 20.56 | 14.87 | 11.81 | 10.85 | 9.046 | 7.756   | 15.79 | 1.637                                      | 3.452 | 11.21 | 5.837 | 11.6  | 20.63 | 17.8  | 11.65 | 16.31 | 16.45 | 13.97 | 20.84 |
| <i>Nitrospirae</i>           | 0.035 | 0.022                                      | 0     | 0.527 | 1.818 | 2.657 | 1.94  | 2.666 | 3.878 | 2.486 | 0.986 | 2.152   | 1.76  | 0                                          | 0.027 | 1.745 | 1.006 | 1.1   | 1.991 | 0.88  | 1.591 | 1.376 | 2.118 | 1.444 | 2.019 |
| <i>Planctomycetes</i>        | 0.617 | 0.238                                      | 0.254 | 0.206 | 0.442 | 0.673 | 0.582 | 2.892 | 1.175 | 1.525 | 1.19  | 1.371   | 0.422 | 0.358                                      | 0.348 | 0.191 | 0.345 | 0.303 | 0.905 | 1.125 | 0.521 | 0.439 | 0.326 | 0.373 | 0.178 |
| <i>Chlorobi</i>              | 0.149 | 0.26                                       | 0.869 | 2.75  | 1.622 | 2.373 | 1.649 | 3.163 | 4.505 | 3.448 | 2.568 | 3.358   | 1.877 | 0.051                                      | 0.589 | 0.981 | 0.489 | 1.441 | 0.543 | 0.636 | 3.326 | 1.083 | 0.554 | 1.025 | 0.416 |
| <i>Acidobacteria</i>         | 0.085 | 0.065                                      | 0     | 0.115 | 0.147 | 0.638 | 0.873 | 0.587 | 0.37  | 0.599 | 0.187 | 0.851   | 0.235 | 0.051                                      | 0.321 | 0.191 | 0.086 | 0.379 | 1.538 | 0.538 | 0.376 | 0.264 | 0.228 | 0.326 | 0.534 |
| <i>Alphaproteobacteria</i>   | 2.91  | 0.238                                      | 0.403 | 0.481 | 0.049 | 0.283 | 0.679 | 0.678 | 0.209 | 0.29  | 0.051 | 0.118   | 1.079 | 0.307                                      | 0.99  | 0.136 | 0.173 | 0.417 | 0.452 | 0.147 | 0.058 | 0.205 | 0.033 | 0.279 | 0     |
| <i>Caldiseptica</i>          | 0.177 | 0                                          | 0     | 0.138 | 0     | 0     | 0     | 0     | 0.016 | 0     | 0.068 | 0.024   | 0.023 | 0.153                                      | 0     | 0.055 | 0     | 0.038 | 0     | 0     | 0.058 | 0.029 | 0.065 | 0     | 0     |
| <i>Verrucomicrobia</i>       | 1.065 | 0.043                                      | 0.085 | 0.963 | 0.049 | 0.071 | 0     | 0.09  | 0.209 | 0.109 | 0.119 | 0.071   | 0.141 | 0.205                                      | 0.027 | 0.136 | 0.173 | 0     | 0.049 | 0.231 | 0.146 | 0.033 | 0     | 0.059 | 0     |
| <i>Cyanobacteria</i>         | 0.142 | 0.022                                      | 0.912 | 3.507 | 0.098 | 0.142 | 1.746 | 1.582 | 0.145 | 0.073 | 0.051 | 0.236   | 0.023 | 0                                          | 3.265 | 1.036 | 0.23  | 0.834 | 0.271 | 0.147 | 0.058 | 0.117 | 0.033 | 0.419 | 0.059 |
| <i>Armatimonadetes</i>       | 0.028 | 0.022                                      | 0.127 | 0.115 | 0.098 | 0.142 | 0.097 | 0.045 | 0.241 | 0.073 | 0.034 | 0.095   | 0.047 | 0.307                                      | 0.134 | 0     | 0.201 | 0.076 | 0     | 0.049 | 0.087 | 0.029 | 0     | 0     | 0     |
| <i>Gemmatimonadetes</i>      | 0     | 0                                          | 0.021 | 0.023 | 0     | 0     | 0.194 | 0.362 | 0.097 | 0.2   | 0.119 | 0.213   | 0.07  | 0                                          | 0.054 | 0.109 | 0.029 | 0.038 | 0.09  | 0.44  | 0.116 | 0.029 | 0     | 0.047 | 0     |
| <i>Betaproteobacteria</i>    | 3.577 | 0.736                                      | 0.085 | 0.252 | 0     | 0.142 | 0.097 | 0.271 | 0.048 | 0.054 | 0.034 | 0.473   | 0.399 | 0.46                                       | 0.054 | 1.104 | 0.058 | 0.114 | 0.09  | 0.196 | 0     | 0.029 | 0.033 | 3.586 | 0.059 |
| <i>Actinobacteria</i>        | 3.172 | 0.087                                      | 0.212 | 0.092 | 0.147 | 0     | 0     | 0.016 | 0.127 | 0     | 0     | 0.023   | 0.205 | 0.161                                      | 0     | 0.029 | 0     | 0     | 0     | 0.029 | 0.029 | 0     | 0.047 | 0.119 | 0     |
| <i>Synergistetes</i>         | 2.413 | 0.606                                      | 1.23  | 0.206 | 0.049 | 0     | 0     | 0     | 0.032 | 0     | 0     | 0.094   | 3.018 | 0.428                                      | 0     | 0.029 | 0     | 0     | 0     | 0     | 0     | 0     | 0     | 0     | 0     |
| <i>Gammaproteobacteria</i>   | 0.894 | 0.065                                      | 0.17  | 0     | 0     | 0.425 | 0.097 | 0.407 | 0.209 | 0.054 | 0.051 | 0.047   | 0.188 | 0.205                                      | 0.054 | 0.041 | 0.086 | 0.265 | 0.633 | 0.147 | 0.087 | 0.029 | 0.033 | 0.419 | 0.178 |
| <i>Thermotogae</i>           | 0.61  | 0.087                                      | 0     | 0.023 | 0     | 0     | 0     | 0     | 0     | 0     | 0     | 0       | 0     | 0                                          | 0.348 | 0.027 | 0     | 0     | 0     | 0     | 0     | 0     | 0     | 0     | 0     |
| <i>Tenericutes</i>           | 0.426 | 0.173                                      | 0.721 | 0.367 | 0     | 0     | 0     | 0     | 0     | 0     | 0     | 0       | 0     | 0.102                                      | 0.455 | 0.191 | 0     | 0.038 | 0     | 0     | 0     | 0     | 0     | 0     | 0     |
| <i>Fusobacteria</i>          | 0.177 | 0                                          | 0     | 0.069 | 0     | 0.071 | 0     | 0     | 0     | 0     | 0     | 0       | 0     | 0                                          | 0     | 0     | 0     | 0     | 0     | 0     | 0     | 0     | 0     | 0     | 0     |
| <i>Fibrobacteres</i>         | 0.106 | 0                                          | 0     | 0     | 0     | 0     | 0     | 0     | 0     | 0     | 0     | 0       | 0     | 0                                          | 0     | 0     | 0     | 0     | 0     | 0     | 0     | 0     | 0     | 0     | 0     |
| <i>Lentisphaerae</i>         | 0.099 | 0.13                                       | 0     | 0.023 | 0     | 0     | 0     | 0     | 0     | 0     | 0     | 0       | 0.051 | 0                                          | 0     | 0     | 0.038 | 0     | 0     | 0     | 0     | 0     | 0     | 0     | 0     |
| <i>Epsilonproteobacteria</i> | 0.192 | 0                                          | 0.021 | 0     | 0     | 0     | 0     | 0     | 0.018 | 0     | 0     | 0       | 0     | 0.051                                      | 0     | 0     | 0.038 | 0     | 0     | 0     | 0     | 0     | 0     | 0     | 0.059 |
| <i>Chlamydiae</i>            | 0.035 | 0                                          | 0     | 0.115 | 0.197 | 0.035 | 0.194 | 0.136 | 0.177 | 0.109 | 0.153 | 0.047   | 0.399 | 0                                          | 0.294 | 0.082 | 0.029 | 0.265 | 0     | 0.098 | 0.231 | 0.088 | 0.065 | 0.14  | 0.416 |
| <i>Elusimicrobia</i>         | 0.014 | 0.022                                      | 0.085 | 0     | 0     | 0.097 | 0.045 | 0.016 | 0.054 | 0     | 0.024 | 0       | 0.051 | 0.054                                      | 0     | 0     | 0     | 0     | 0     | 0     | 0     | 0     | 0     | 0     | 0     |
| <i>Thermi</i>                | 0     | 0                                          | 0     | 0     | 0     | 0     | 0.097 | 0     | 0     | 0     | 0     | 0       | 0     | 0                                          | 0     | 0     | 0     | 0     | 0     | 0     | 0     | 0     | 0     | 0     | 0     |
| <i>Candidate phyla</i>       |       |                                            |       |       |       |       |       |       |       |       |       |         |       |                                            |       |       |       |       |       |       |       |       |       |       |       |
| GN04                         | 0     | 0                                          | 0     | 0     | 0     | 0.873 | 0.452 | 4.65  | 4.973 | 2.67  | 6.148 | 0.587   | 0     | 0                                          | 0     | 0     | 0.152 | 1.357 | 1.125 | 5.35  | 11.98 | 3.845 | 1.723 | 0.713 |       |
| KSB3                         | 0     | 0                                          | 0     | 0.321 | 4.029 | 0     | 0     | 0     | 12.2  | 38.63 | 12.49 | 5.443   | 0     | 0                                          | 1.772 | 2.703 | 0     | 0     | 0     | 0.405 | 0.966 | 5.018 | 4.285 | 3.088 |       |
| FCPU426                      | 0.057 | 0                                          | 0     | 0     | 0     | 0     | 0     | 0.354 | 1.978 | 0.595 | 0.189 | 0.094   | 0     | 0                                          | 0     | 0     | 1.81  | 4.059 | 2.776 | 0.996 | 1.075 | 0.559 | 0.178 | 0     |       |
| OP3                          | 0.27  | 0.022                                      | 0.53  | 3.805 | 0.344 | 0     | 0     | 0.016 | 0     | 0     | 0.024 | 0.023   | 0     | 2.301                                      | 0.736 | 0.259 | 0     | 0     | 0     | 0     | 0     | 0     | 0     | 0.059 | 0     |
| WPS-2                        | 0.021 | 0                                          | 0.064 | 0.138 | 0.197 | 1.204 | 0     | 0.09  | 0.016 | 0.036 | 0.119 | 0.095   | 0.328 | 0.051                                      | 0.214 | 0.027 | 0.029 | 0.341 | 0.09  | 0     | 0.029 | 0.065 | 0.186 | 0.238 |       |
| NKB19                        | 0.376 | 0.065                                      | 0.042 | 0.092 | 0     | 0.097 | 0.316 | 0.064 | 0.036 | 0.068 | 0.024 | 0.047   | 0.256 | 0.08                                       | 0.164 | 0     | 0.038 | 0.09  | 0.489 | 0.174 | 0.059 | 0     | 0.047 | 0     |       |
| WSA2                         | 0.298 | 0.022                                      | 0.127 | 0     | 0.035 | 0.097 | 0     | 0     | 0.054 | 0     | 0     | 0       | 0.409 | 0.08                                       | 0.027 | 0     | 0.181 | 0     | 0     | 0.059 | 0     | 0     | 0     | 0.059 |       |
| BRC1                         | 0.085 | 0.043                                      | 0.064 | 0.023 | 0     | 0.035 | 0     | 0.045 | 0     | 0     | 0.189 | 0       | 0.46  | 0.134                                      | 0.055 | 0.058 | 0     | 0     | 0.049 | 0.029 | 0.029 | 0     | 0.047 | 0     |       |
| OP11                         | 0.035 | 0                                          | 0.678 | 1.352 | 0.197 | 0.142 | 0     | 0.181 | 0.241 | 0.036 | 0.051 | 0.024   | 0.07  | 0.051                                      | 0.268 | 0     | 0.23  | 0.038 | 0     | 0.049 | 0.058 | 0     | 0.033 | 0     |       |
| WWE1                         | 2.86  | 0.627                                      | 1.442 | 0.894 | 0     | 0.319 | 0     | 0.587 | 0     | 0     | 0     | 0       | 0.297 | 2.542                                      | 0.055 | 0.029 | 0     | 0     | 0.098 | 0     | 0     | 0     | 0     | 0     |       |
| Hyd24-12                     | 0.745 | 0                                          | 0     | 0     | 0     | 0     | 0     | 0     | 0     | 0     | 0     | 0       | 0.051 | 0                                          | 0     | 0     | 0     | 0     | 0     | 0     | 0     | 0     | 0     | 0     | 0     |
| OP9                          | 0.22  | 0.022                                      | 0     | 0     | 0     | 0.035 | 0     | 0     | 0.036 | 0     | 0     | 0       | 0.102 | 0                                          | 0     | 0     | 0     | 0     | 0     | 0     | 0     | 0     | 0     | 0     | 0     |
| OD1                          | 0.085 | 0.043                                      | 0.064 | 0.527 | 0.049 | 0     | 0     | 0.209 | 0.091 | 0.51  | 0.024 | 0.375   | 0.665 | 0.562                                      | 0.027 | 0.345 | 0.19  | 0.09  | 0     | 0.289 | 0.117 | 0.033 | 0     | 0.653 |       |
| WS1                          | 0.078 | 0                                          | 0.042 | 0     | 0     | 0     | 0     | 0     | 0.036 | 0.034 | 0     | 0       | 0     | 0.054                                      | 0.082 | 0.086 | 0     | 0     | 0.196 | 0     | 0     | 0     | 0     | 0     |       |
| OP8                          | 0.064 | 0.022                                      | 0     | 0.023 | 0     | 0     | 0.09  | 0     | 0     | 0     | 0     | 0       | 0.102 | 0.08                                       | 0     | 0     | 0     | 0     | 0     | 0.088 | 0.033 | 0     | 0     | 0     |       |
| TM6                          | 0.021 | 0.173                                      | 0.021 | 0.069 | 0.344 | 0.071 | 0.873 | 0.226 | 0.257 | 0.218 | 0.136 | 0.307   | 0.07  | 0                                          | 0.161 | 0.109 | 0.115 | 0.417 | 0.181 | 0.538 | 0.347 | 0.146 | 0.098 | 0.238 |       |
| SAR406                       | 0.014 | 0                                          | 0     | 0     | 0     | 0     | 0     | 0     | 0     | 0     | 0     | 0       | 0     | 0                                          | 0     | 0     | 0     | 0     | 0     | 0     | 0     | 0     | 0     | 0     | 0     |
| GN02                         | 0.014 | 0                                          | 0     | 0     | 0     | 0.213 | 0.097 | 0.045 | 0.257 | 0.018 | 0.017 | 0       | 0.023 | 0                                          | 0     | 0     | 0.038 | 0     | 0.049 | 0.087 | 0.088 | 0     | 0     | 0     |       |
| WS4                          | 0.007 | 0                                          | 0     | 0     | 0     | 0     | 0     | 0     | 0     | 0     | 0     | 0       | 0     | 0                                          | 0     | 0     | 0     | 0     | 0     | 0     | 0     | 0     | 0     | 0     |       |
| WS3                          | 0.007 | 0                                          | 0     | 0     | 0     | 0     | 0     | 0.097 | 0.054 | 0.153 | 0.307 | 0       | 0     | 0                                          | 0     | 0     | 0     | 0     | 0     | 0.029 | 0     | 0     | 0.047 | 0     |       |
| TM7                          | 0.007 | 0                                          | 0     | 0     | 0     | 0     | 0     | 0     | 0     | 0     | 0     | 0       | 0     | 0                                          | 0     | 0     | 0     | 0     | 0     | 0     | 0     | 0     | 0     | 0     |       |
| SR1                          | 0.007 | 0                                          | 0     | 0     | 0     | 0     | 0     | 0     | 0     | 0     | 0     | 0       | 0     | 0                                          | 0     | 0     | 0     | 0     | 0     | 0     | 0     | 0     | 0     | 0     |       |
| TA18                         | 0.007 | 0                                          | 0     | 0     | 0     | 0     | 0     | 0     | 0     | 0     | 0     | 0       | 0     | 0                                          | 0     | 0     | 0     | 0     | 0     | 0     | 0     | 0     | 0     | 0     |       |
| NC10                         | 0     | 0.022                                      | 0     | 0     | 0     | 0     | 0.045 | 0.145 | 0.054 | 0.034 | 0.024 | 0       | 0     | 0                                          | 0     | 0     | 0     | 0     | 0     | 0     | 0     | 0.059 | 0     | 0     |       |
| LD1                          | 0     | 0                                          | 0     | 0.573 | 0.147 | 0.035 | 0.097 | 0     | 0     | 0     | 0     | 0       | 0     | 0.187                                      | 0.273 | 0.086 | 0.038 | 0.09  | 0     | 0     | 0     | 0     | 0     | 0     |       |
| FBP                          | 0     | 0                                          | 0     | 0     | 0     | 0     | 0     | 0     | 0     | 0     | 0     | 0       | 0     | 0.027                                      | 0     | 0     | 0     | 0     | 0     | 0     | 0     | 0     | 0     | 0     |       |
| <i>Archaea</i>               |       |                                            |       |       |       |       |       |       |       |       |       |         |       |                                            |       |       |       |       |       |       |       |       |       |       |       |
| <i>Methanosaeta</i>          | 3.059 | 27.13                                      | 10.26 | 5.226 | 3.292 | 1.027 | 6.208 | 3.389 | 14.9  | 14.66 | 15.54 | 16.48</ |       |                                            |       |       |       |       |       |       |       |       |       |       |       |
